# Supplementary material
Source: MDPI journal article supplement (https://www.mdpi.com/2073-4344/11/5/541)
Supplement: s1 [file s1]

## Supplementary material

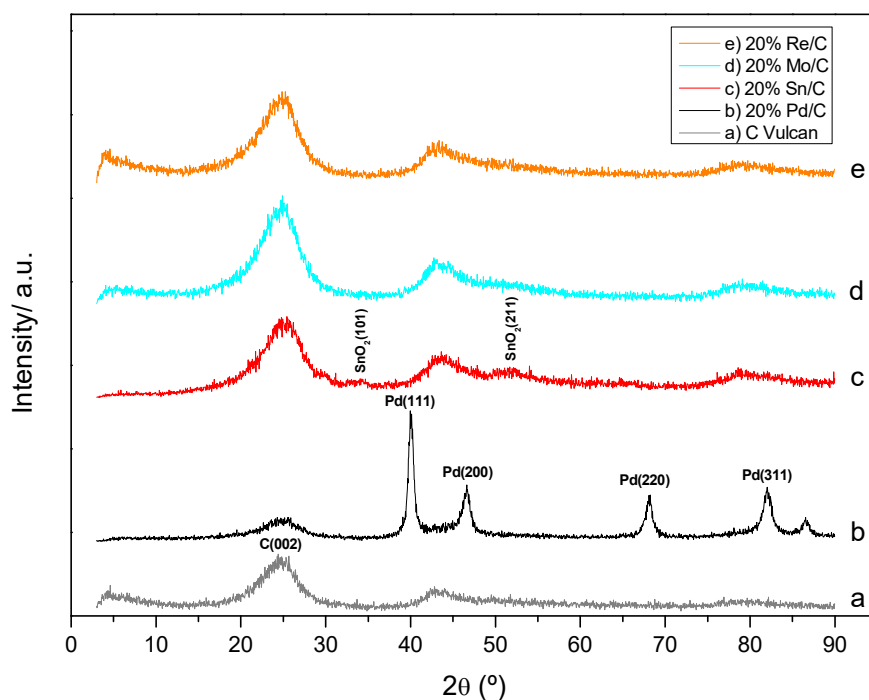

Figure S1. XRD pattern of carbon Vulcan and different metals studied over carbon: a) Carbon Vulcan; b) 20 % Pd/C; c) 20 % Sn/C; d) 20 % Mo/C; e) 20 % Re/C.

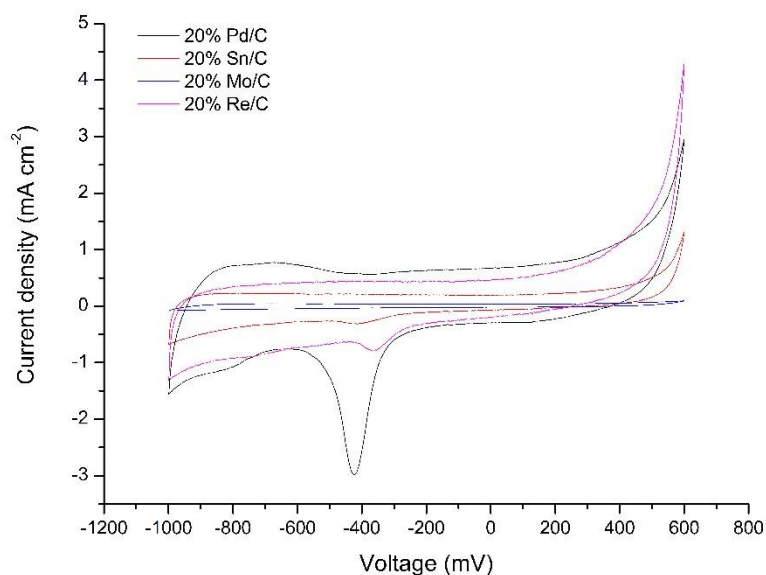

Figure S2. Comparison of cyclic voltammograms obtained for the different co-metals (20% Sn, Mo and Re over carbon) and 20% Pd/C catalyst in a solution of KOH 1.0 mol  $\text{l}^{-1}$ . E (mV) vs Ag/AgCl (3 M)). (Scan rate:  $50 \text{ mV s}^{-1}$  at room temperature)



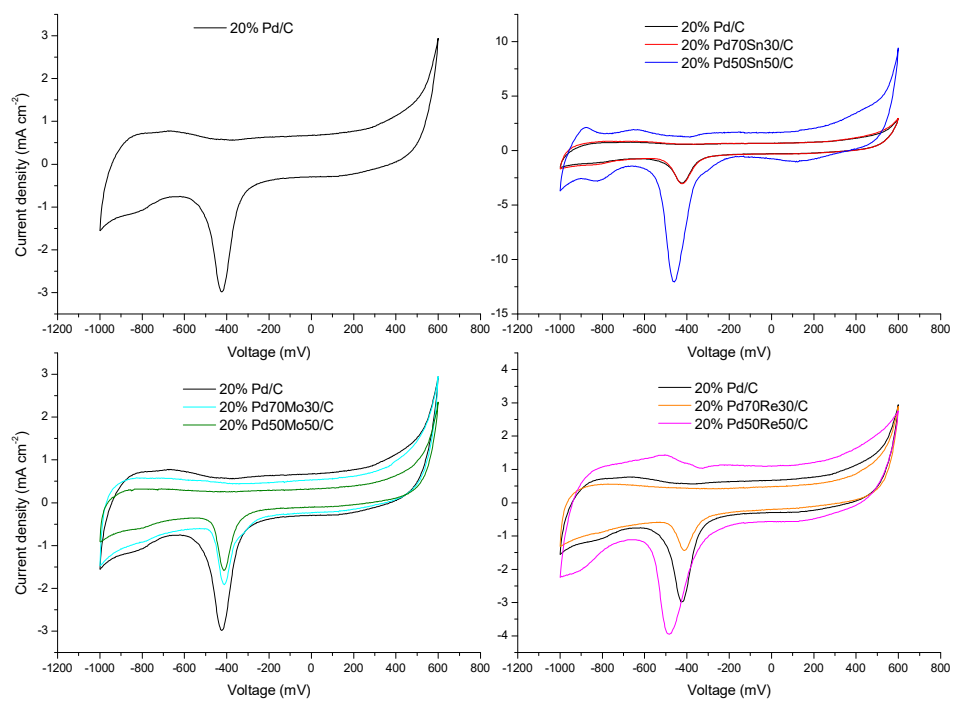

Figure S3. Comparison of cyclic voltammograms obtained for bimetallic catalysts with different co-metals (Sn, Mo and Re) and Pd/C catalyst in a solution of KOH 1.0 mol l<sup>-1</sup>. E (mV) vs Ag/AgCl (3 M)). (Scan rate: 50 mV s<sup>-1</sup> at room temperature)



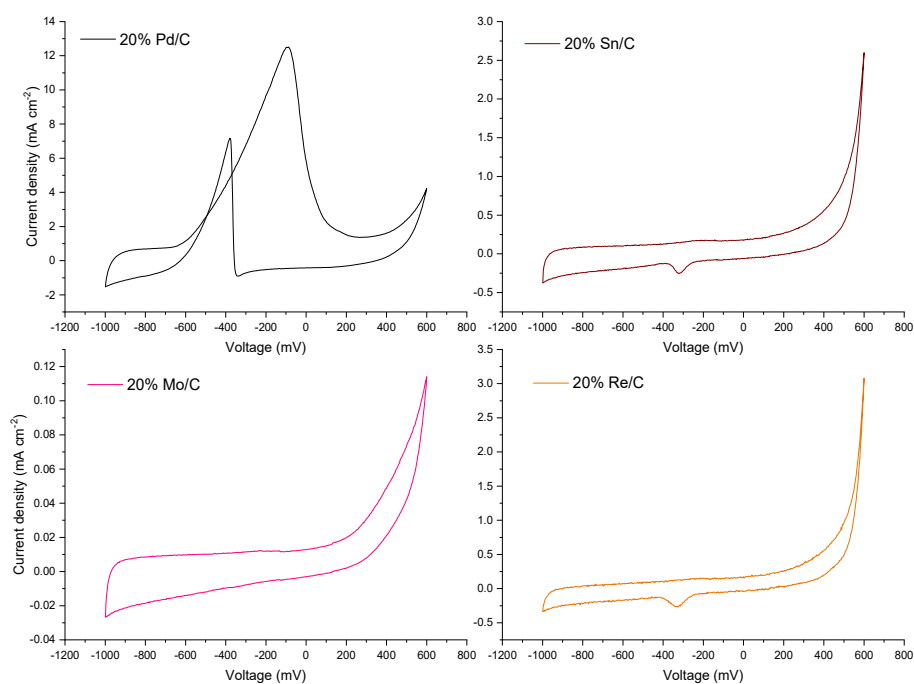

Figure S4. Performance of the different cometal over carbon in a solution of KOH 1.0 mol l<sup>-1</sup> + EtOH 1.0 mol l<sup>-1</sup>. E (mV) vs Ag/AgCl (3 M)). (Scan rate: 50 mV s<sup>-1</sup> at room temperature)

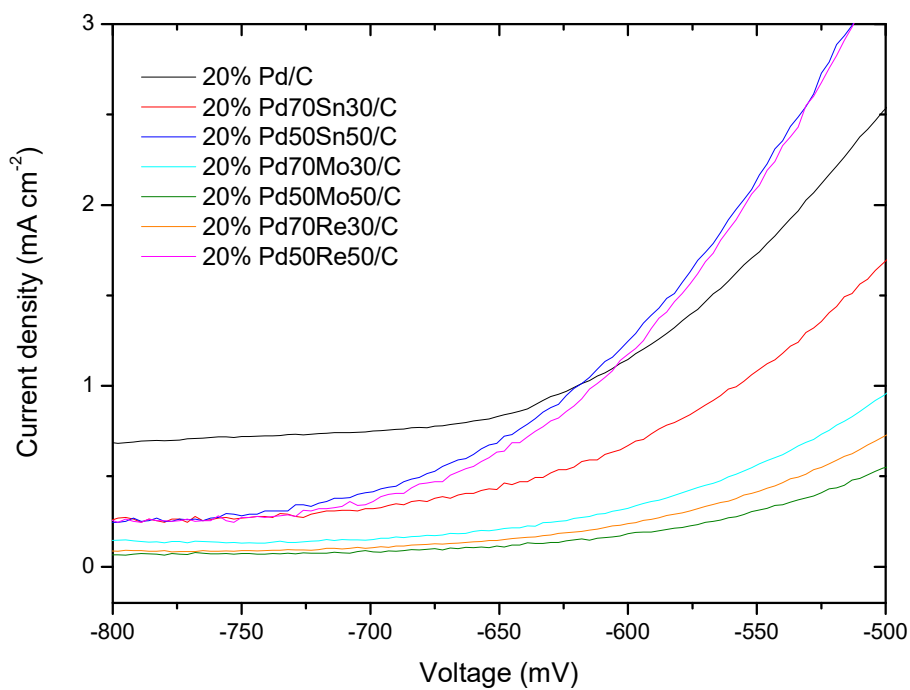

Figure S5. Onset potential for the different catalysts studied: 20 % Pd/C (—), 20 % Pd<sub>70</sub>Sn<sub>30</sub>/C (—), 20 % Pd<sub>50</sub>Sn<sub>50</sub>/C (—), 20 % Pd<sub>70</sub>Mo<sub>30</sub>/C (—), 20 % Pd<sub>50</sub>Mo<sub>50</sub>/C (—), 20 % Pd<sub>70</sub>Re<sub>30</sub>/C (—) and 20 %



Pd<sub>50</sub>Re<sub>50</sub>/C (—). Solution of KOH 1.0 mol l<sup>-1</sup> + EtOH 1.0 mol l<sup>-1</sup>. (Scan rate: 50 mV s<sup>-1</sup> at room temperature)

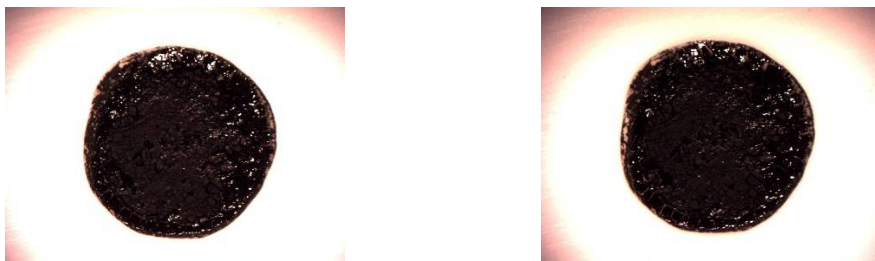

Figure S6. Microscopy images of the sample over the glassy carbon electrode before (left) and after (right) the electrochemical reaction in a solution of KOH 1 mol l<sup>-1</sup> containing EtOH 1 mol l<sup>-1</sup>.



a)

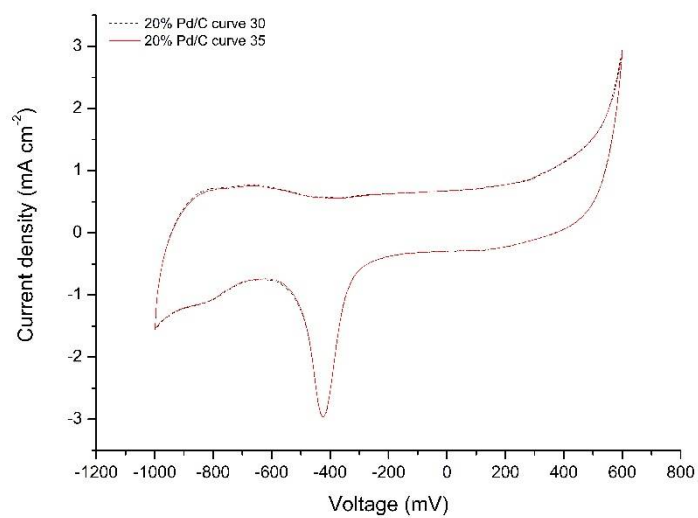

b)

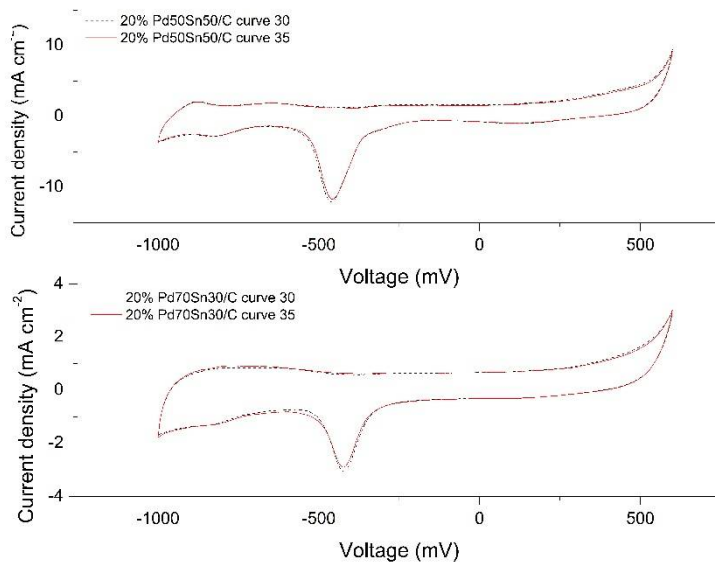

c)

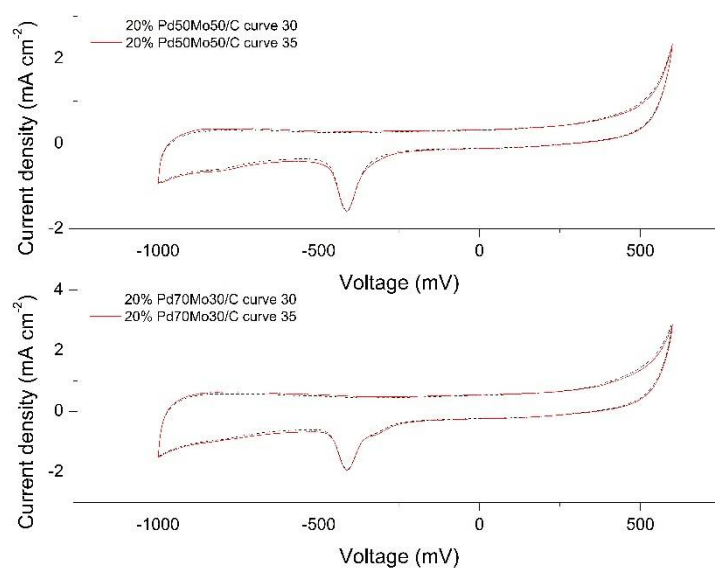

d)



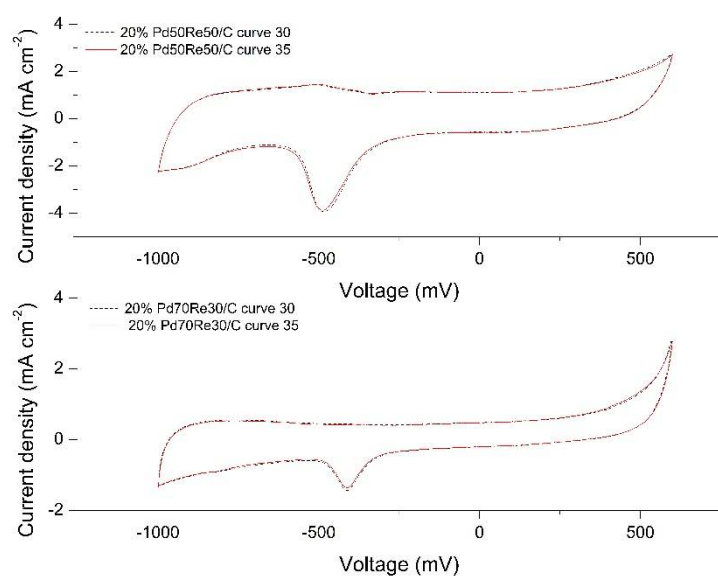

Figure S7. Consecutive CVs cycles in a solution of KOH 1 mol l<sup>-1</sup> for: a) Pd/C catalysts; b) Pd-Sn/C catalysts; c) Pd-Mo/C catalysts; d) Pd-Re/C catalysts. E (mV) vs Ag/AgCl (3 M)). (Scan rate: 50 mV s<sup>-1</sup> at room temperature)
